1  
2  
3  
4  
5  
6  
7  
8  
9  
10  
11  
12  
13  
14  
15  
16  
17  
18  
19  
20

**Extrinsic motivators drive children’s cooperation to conserve forests**

Aleah Bowie<sup>1\*</sup>, Wen Zhou<sup>1\*†</sup>, Jingzhi Tan<sup>2</sup>, Philip White<sup>3</sup>, Tara Stoinski<sup>4</sup>, Yanjie Su<sup>5</sup>, Brian Hare<sup>1,6</sup>

**Affiliations:**

<sup>1</sup>Department of Evolutionary Anthropology, Duke University, Durham, NC, USA

<sup>2</sup>Institute of Psychology, Leiden University, Leiden, The Netherlands

<sup>3</sup>Department of Statistics, Brigham Young University, Provo, UT, USA

<sup>4</sup>Dian Fossey Gorilla Fund, Atlanta, GA, USA

<sup>5</sup>Peking University, School of Psychological and Cognitive Sciences and Beijing Key Laboratory of Behavior and Mental Health, Beijing, China

<sup>6</sup>Center for Cognitive Neuroscience, Duke University, Durham, NC, USA

21 \*The first two authors contributed equally to this work and agree to share first authorship.

22

23 †Corresponding Authors

24

25 Wen Zhou

26 [wen.zhou@duke.edu](mailto:wen.zhou@duke.edu)

27 984-377-9345

28 104 Biological Sciences Building

29 Campus Box 90383

30 Durham, NC 27708-9976

31

32 **One Sentence Summary:** Extrinsic motivation increases donations for forests among children

33 and adolescents in the United States, China, and the Democratic Republic of the Congo.

34

35 **Abstract:** Forests are essential common-pool resources. Understanding school-aged children and

36 adolescents' motivations to conserve forests is critical for improving conservation education. In

37 two experiments with school age children and adolescents (age range: 6-16; N=1088), we

38 demonstrate that extrinsic, rather than intrinsic motivations lead to successful cooperation in

39 common-pool goods games to maintain a forest. We investigate participants from three

40 nationalities (China, D. R. Congo and U.S.) and find certainty of losing individual payoffs

41 significantly boosts successful cooperative conservation efforts across cultures. Within the U.S.

42 sample, we find two other types of extrinsic incentive, priming discussions of the value of forests

43 and delay of payoffs as punishment also encourage the success of cooperative conservation.

44 Conservation simulations, like those used here, may allow educators to encourage forest

45 protection by allowing groups to experience successful cooperation and the extrinsic incentives

46 needed to motivate forest conservation. Future research will be needed to test if these types of

47 simulations have long term positive impact on participant's attitudes and behavior toward forest

48 conservation.

## 49 **Introduction**

50           Forests are vital to human and planetary health. They are common-pool goods that  
51 require both local and international cooperation to maintain (Van Vugt, 2009). Educating the  
52 public to support forest health through personal behavior and policy remains a top priority for  
53 governments and conservationists. School aged children and adolescents have long been  
54 regarded as a critical audience for this type of education. Positive exposure to wildlife and forests  
55 in zoos and parks has commonly been hypothesized to translate into pro-environmental behavior  
56 in adulthood (Bowie et al., 2020; Zhang et al., 2019). However, it remains unclear what type of  
57 educational experiences might encourage pro-conservation behavior toward forests across  
58 diverse populations (Saylan & Blumstein, 2011).

59           The *Biophilia Hypothesis (BH)* suggests humans evolved intrinsic motivation to care for  
60 the natural world (Kellert, 1995; Wilson, 1984). It predicts that universally across cultures our  
61 selfish need to interact with life motivates humans to protect natural areas (Kahn, 1997). Early  
62 exposure to nature should nurture this intrinsic motivation and result in increased expression  
63 while extrinsic rewards may dampen it (Ariely et al., 2009; Warneken & Tomasello, 2008).

64           In contrast, the *Anthrophilia Hypothesis (AH)* posits that humans evolved intrinsic  
65 motivation for prosocial behavior (i.e. beneficial but potentially selfishly motivated social acts as  
66 opposed to antisocial interactions; Eisenberg et al., 1983) toward kin ingroup members and  
67 strangers, but not more abstract social categories like future-others or forests (Chapais, 2001;  
68 Hill & Hurtado, 2017; Moore, 2009; Silk, 2002, 2006; Silk & House, 2011; Singer, 1981;  
69 Warneken et al., 2007). Any prosociality toward abstract social categories is an accidental by-  
70 product and emergent property of plasticity in our evolved motivation to help other humans. The  
71 AH predicts that cross-cultural variability in pro-conservation behaviors toward forests is in large

72 part shaped by ecological and economic uncertainty (Boyd et al., 2010; Eom et al., 2016;  
73 Frankenhuis et al., 2016; Henrich et al., 2005; Spence et al., 2012; Van der Linden, 2015).  
74 Experiences that incorporate extrinsic rewards and teach the link between material gain,  
75 reputation enhancement or punishment and forest conservation are likely needed during  
76 childhood or adolescence to internalize the value of these shared resources (Ryan & Deci, 2000,  
77 2020).

78 School age children and young adolescents provide a strong test of these hypotheses.  
79 They are old enough to understand the concept of a common-pool good (children as young as six  
80 behave strategically in similar public goods games; (Engelmann et al., 2018; Hermes et al., 2020;  
81 Keil et al., 2017; Koomen & Herrmann, 2018; Vogelsang et al., 2014; Yang et al., 2018) but  
82 their motivations are not yet fully shaped by adult participation in economic markets. However,  
83 little, if any, experimental work has examined the willingness of juveniles, especially children, to  
84 help abstract, nonhuman entities like forests (Flanagan & Galloway, 2014; Koomen & Herrmann,  
85 2018).

86 Adult motivation for conservation has been tested experimentally using a collective-risk  
87 common-pool goods game (Milinski et al., 2008). In this game, the entire group is threatened  
88 with losing their endowment unless individual donations exceed a threshold needed to maintain a  
89 common-pool good. In Western populations the certainty of personal loss, reputation, and the  
90 immediacy of the benefit the good delivers largely determine group success (Hauser et al., 2014;  
91 Jacquet et al., 2013; Milinski et al., 2008). What is needed to better understand the origin of these  
92 preferences is a version of this paradigm designed for cross-cultural use with children.

93 Previous research has shown that cognitive preferences relating to certain decision  
94 making are shaped by considerations of resources within environments (Ellis, Figueredo,

95 Brumbach, & Schlomer, 2009; Bateson et al., 2014). Frankenhuis et al. (2016) identified two  
96 ecological factors that influenced decision-making: harshness, defined as the rates of mortality  
97 and morbidity caused by factors an individual cannot control, and unpredictability, defined as the  
98 change in mean variation in harshness over time. This framework provides a potential  
99 explanation for populational differences in decisions about resource distribution. Populations in  
100 highly uncertain environments tend to be more vigilant, more risk prone, and steeper temporal  
101 discounters than those in less uncertain environments (Ellis et al., 2009; Salali & Migliano, 2015;  
102 Mittal & Griskevicius, 2014).

103         Here we used the paradigm developed by Milinski et al (2008) to test children's  
104 cooperative motivations. School aged children and adolescents decided what portion of an  
105 endowment they wished to contribute to maintaining the conservation of a local forest. In two  
106 experiments, we varied the type and amount of motivation for donating and assessed  
107 participants' donation patterns to test the BH and the AH and to examine how children might be  
108 introduced to the concept of sustainability through cooperative forest management simulations.

109

## 110 **Experiment 1**

111         In experiment 1, we tested how risk of losing one's own rewards influenced motivation  
112 for pro-environmental behavior towards a forest in school aged participants from three different  
113 countries, the United States, the People's Republic of China, and the Democratic Republic of the  
114 Congo. Children and adolescents from the three countries provide a powerful test of our  
115 hypotheses because these countries vary on country-wide levels of forest coverage, the types of  
116 forest exposure children receive and resource uncertainty. Based on the percentage of land area  
117 covered by forest, DRC provides, on average, the highest potential for forest exposure (56.5%),

118 followed by United States (33.9%) and China (22%; *The World Bank Open Data*, 2018). While  
119 exposure to forest will still vary greatly within countries this data still helps to understand how  
120 dominant forests are in the ecology, economy and culture of each country. Early positive  
121 exposure to forests can also be determined by educational system. Children in the U.S. often  
122 participate in some form of environmental education (e.g., passive education through park visits  
123 with environmental programs or active camp or school classes) while this type of experience is  
124 comparatively rare in China and DRC. Based on country-level statistics of life expectancy,  
125 health outcomes, and GPD per capita (*WHO's Global Health Observatory*, 2019). DRC is  
126 comparatively more resource uncertain, and the U.S. is comparatively less resource uncertain,  
127 with China in between.

128         The BH predicts cooperation will be strongest in response to the level of nature exposure  
129 and will only be reduced by extrinsic motivators. Children from the U.S. or DRC should be most  
130 likely to be intrinsically motivated to cooperate to protect forests. The AH predicts cooperation  
131 will be strongest in response to high extrinsic rewards or punishments regardless of forest  
132 exposure or education and will vary cross culturally depending on the level of uncertainty  
133 characterizing a group's environment.

## 134 **Methods**

### 135 *Participants*

136         Participants aged six to sixteen (N=570) from the U.S., China, and DRC took part in this  
137 experiment. We decided the sample size basing on the number of children and adolescents we  
138 had access to in each testing location. Participants from the U.S. (N = 198; 81 females, 117  
139 males; Age range: 6 to 11; Mean age  $\pm$  SD: 8.04 $\pm$ 1.57) were recruited from a summer camp at  
140 Zoo Atlanta in the suburban area of Atlanta, Georgia. Each camp was week-long, and children

141 and adolescents between ages four and fifteen from across the Atlanta area could participate in  
142 the camp. The participants were mostly public-school attendees from middle income families in  
143 the Metro-Atlanta area that is demographically diverse. However, in the context of the camp it  
144 was not viewed as appropriate to collect information on individual participant's race or  
145 socioeconomic status. All participants took part in activities at camp that included viewing zoo  
146 animals, attending behind the scenes tours and demonstrations by zookeepers and educators, and  
147 making nature related art projects. Participants were tested during the camp session at Zoo  
148 Atlanta in a space known as the "tree house". It is an approximately 10 x 10 m room situated  
149 above one of the small primate exhibits. Chinese participants (N = 216; 108 females, 108 males;  
150 Age range: 6 to 14; Mean age  $\pm$  SD: 9.60 $\pm$ 1.84) were recruited from a primary school in a suburb  
151 of Beijing. All participants included in the study were from a local primary school that served  
152 low to middle-income populations. Participants were tested in a classroom. Congolese  
153 participants (N = 156; 89 females, 66 males, 1 did not report gender; Age range: 6 to 16; Mean  
154 age  $\pm$  SD: 11.75  $\pm$  2.20) were children and adolescents from local schools in and around  
155 Kinshasa, the capital city of the DRC. Two of the schools served more rural, low-income  
156 populations on the outskirts of Kinshasa, while the other two schools served more mid-income  
157 families in downtown Kinshasa. Children were tested at their school in a quiet room or outdoor  
158 area or in the education center at Lola ya Bonobo sanctuary. The mean age of the DRC  
159 participants was older than the other countries largely due to more variation in chronological age  
160 within each grade.

161 Data from an additional 96 participants was excluded from the analysis. Subjects were  
162 tested in groups (see below) and in sixteen groups testing was interfered with by instructions

163 from a teacher or conversations between participants (groups excluded: U.S.: N=3; China: N = 4;  
164 DRC: N = 9). One group was excluded from the DRC sample due to lack of age information.

165 *Test*

166 We used a between subject design for both experiments. Six age matched peers played  
167 together and received tokens after an orientation from an experimenter (see Appendix S1 for the  
168 scripts). Groups consisted of participants from the same country and same camp or classroom.  
169 Participants learned the goal of the game was for their group to meet a donation threshold  
170 required to keep a forest healthy. They were informed that they would anonymously decide to  
171 keep the tokens they received until the end and they would be allowed to exchange the tokens for  
172 prizes (i.e. toys or candies) or contribute any portion to local forest conservation. They were told  
173 they would have a set number of trials to reach the goal. The experimenter added tokens to a  
174 Connect Four® board(s) after each trial within a round to display the cumulative number of  
175 tokens given over the course of the trials (Fig S1). The board allowed participants of all ages to  
176 visually understand how close they were to reaching the threshold.

177 After being oriented, each child from each country was asked the same set of questions to  
178 confirm they understood the task, then they were given two warm-up trials to practice the  
179 donation procedure before the test phase (see Appendix S1). Each group was then assigned to  
180 one of three motivation conditions with age and sex being balanced across conditions (see Table  
181 S1 for the distribution of groups across conditions). The three conditions only differed in the risk  
182 of forfeiting their earnings if the group failed to meet the donation threshold needed to care for  
183 the forest (Fig 1A; see scripts in Appendix S1):

184 *Loss Condition* – Failure to meet the donation threshold results in all participants losing  
185 all their tokens earned in the game.



186           *Risk Condition* – Failure to meet the donation threshold results in a coin toss giving  
187 participants a 50% chance of keeping or losing the tokens earned in the game.

188           *Control Condition* – Participants keep the tokens they earn in the game regardless of  
189 whether their group meets the donation threshold.

190           Before starting the game, participants received 24 tokens, learned the risk to their  
191 earnings if their group failed to meet the donation threshold, and were told they had six trials to  
192 succeed. They could donate 0, 2 or 4 tokens per trial and the donation threshold was 72 tokens  
193 per round (requiring 2 Connect Four® boards to display). Success required an average donation  
194 of at least 2 tokens per trial per child (6 participants \* 2 tokens \* 6 trials). For each trial, each  
195 participant marked on a pre-printed answer sheet whether they wanted to give 0, 2 or 4 tokens to  
196 the Forest Bank. After each trial, the experimenter took each paper from all six individuals,  
197 marked on the data collection sheet how many tokens each individual contributed. The  
198 experimenter ensured all individuals handed a paper each trial and ensured the anonymity.

## 199 **Data analysis**

200           We analyzed the donation pattern at both group level and individual level analysis to  
201 align with different inferential goals. We used binomial generalized linear regression model for  
202 group success to meet the donation threshold where we account for condition, country, and grade  
203 level (see full result in Table S4). In the group level analyses which investigated the effects of  
204 countries' resource uncertainty on group donation pattern, we treated the group total number of  
205 tokens as the response variable. Because participants only chose to donate 0, 2, or 4 tokens each  
206 trial, the donations were not continuous and we used Poisson regression models with country,  
207 grade level, and condition treated as covariates (see full result in Table S5). We further analyzed  
208 individual donation patterns using a mixed effects Poisson regression model with fixed effects

209 for age, sex, country, threshold completion, and accumulated tokens per trial (see full result in  
210 Table S6). We include random effects for individual and group to account for potential  
211 correlation between donations given by the same individual, as well as the same group. We also  
212 calculated the donation pattern by age in each country from results of this model. In all the  
213 analyses, the Loss and Risk conditions were contrasted with the Control. Participants from the  
214 U.S. and the DRC were contrasted with participants from China. For all results, we include z-  
215 statistics, p-values, and 95% confidence intervals on the effect size, which is log odd for the  
216 logistic models.

## 217 **Results and discussion**

218 As AH predicted, results across conditions signaled that extrinsic motivation led to the  
219 highest success rate meeting the threshold (Loss condition  $z = 3.63$ ,  $p < .001$ , 95% CI [1.40 4.46];  
220 Risk condition:  $z = 2.61$ ,  $p = .009$ , 95% CI [0.44, 2.87]; Fig 2). 90.63% and 74.19% succeeded in  
221 Loss and Risk extrinsic conditions, respectively, while only 43.75% of groups succeeded in the  
222 Control condition. Countries' resource uncertainty was also linked to success rates. Compared to  
223 the Chinese sample, groups from the DRC were less successful in meeting the threshold ( $z = -$   
224  $2.34$ ,  $p = .019$ , 95% CI [-2.99, -0.30]). However, no significant difference was found between  
225 groups from China and the U.S.

226 Analyses on group donation revealed similar patterns (Fig 3). Groups across all three  
227 countries gave more in the Loss ( $z = 13.72$ ,  $p < .001$ , 95% CI [0.34, 0.46]) and the Risk condition  
228 ( $z = 8.57$ ,  $p < .001$ , 95% CI [0.20, 0.32]) than they gave in the Control condition. Comparisons  
229 between countries were partially consistent with resource uncertainty driving lower donations.  
230 Groups from DRC donated significantly less compared to the Chinese sample ( $z = -7.63$ ,  $p < .001$ ,

231 95% CI [-0.39, -0.17]), but groups in the U.S. also gave less than Chinese groups ( $z = -4.73$ ,  
232  $p < .001$ , 95% CI [-0.18, -0.07]).

233 The individual level analysis assessed individual donations levels once the threshold was  
234 met and again found little evidence for intrinsic conservation motives, especially in the U.S. and  
235 DRC samples. Results detected that across conditions, individual donations dropped significantly  
236 in trials after the donation threshold was met by participants from the U.S. ( $z = -5.74$ ,  $p < .001$ ,  
237 95% CI [-1.34, -0.62]) and the DRC ( $z = -2.12$ ,  $p = .034$ , 95% CI [-0.83, -0.12]), but not in  
238 China. It is noteworthy that participants from the U.S. were attending a conservation camp and  
239 the DRC is the most forested country, but only participants from China continued to donate to  
240 aid the forest once the donation threshold was met and their own rewards were secured. It is  
241 possible that the relative scarcity of forests in China has increased conservation awareness (Li,  
242 2004). Awareness campaigns may have altered the perception of forest value. Donations made  
243 by the Chinese participants, after the group threshold was met, are also likely an expression of  
244 collectivist cultural norms (Wagner 1995) or are due to a higher sensitivity to experimenter  
245 demand effects (Kagitcibasi, 1997).

246 The individual level analysis also demonstrated that participants growing up in the more  
247 resource certain countries showed increased donation with age, while this same relationship was  
248 not observed in the more resource uncertain environment. In the U.S., older participants gave  
249 more tokens than younger ones ( $z = 4.85$ ,  $p < .0001$ , 95% CI [0.26, 0.65]), However, the Chinese  
250 and Congolese children and adolescents did not show increasing donations with age, even though  
251 we sampled a larger age range in China and DRC.

252

## 253 **Experiment 2**

254           In Experiment 1, children and adolescents across cultures cooperated when motivated by  
255 risk to their own selfish rewards. Experiment 2 tests if we can design an age-appropriate game  
256 for children that simulates sustainable forest management using extrinsic motivators to  
257 encourage cooperation. Sustainability is often introduced through stories or individual  
258 responsibility (e.g., recycling, avoiding straws, turning lights off, etc.) but is less often  
259 introduced through activities that require cooperation, assessment of cost-benefit tradeoffs and  
260 opportunity costs associated with failed cooperation. Here we further tested the *Biophilia* and  
261 *Anthrophilia* hypotheses by having participants play a game in which they experience the types  
262 of decisions that are involved in collective action needed to maintain a common-pool resource  
263 sustainably.

264           As in Experiment 1, children are given tokens, but here it is emphasized that this  
265 endowment is a direct product of a nearby forest. In the main sustainability condition participants  
266 can enhance the productivity of the forest and increase their endowment each round if they  
267 cooperate to meet a threshold of donations required to maintain the health of the forest. If the  
268 group fails to meet the threshold, the forest becomes less productive and they experience a delay  
269 between rounds in receiving their endowment as the forest recovers more slowly from lack of  
270 care. Another group of participants experience a delay condition that was highly similar to the  
271 sustainability condition except no sustainability framing was given and successful cooperation  
272 did not increase productivity. Participants in the two experimental conditions were compared to a  
273 paired control group. No incentives were provided to these control groups other than their  
274 intrinsic motivation to cooperate (see Fig 1B and 1C for illustration of design).

275           The BH predicts that children will succeed in the controls based on intrinsic motivation  
276 alone (and may be reduced by extrinsic motivators), while the AH predicts cooperation will  
277 increase as extrinsic motivators increase the payoff of cooperation.

## 278 **Methods**

### 279 *Participants*

280           A naïve group of children (N=516; 264 females, 252 males; Mean age  $\pm$  SD:  
281 8.07 $\pm$ 1.90) from the same week-long summer camp at Zoo Atlanta participated in this  
282 experiment. All participants took part in camp activities described in Experiment 1. This sample  
283 was chosen to directly test intrinsic levels of cooperation in participants taking part in an  
284 experiential environmental education program (i.e., in the control conditions) versus participants  
285 who in addition to camp activities also directly experienced extrinsic incentives for forest  
286 conservation (i.e., in the Sustainability and Delay condition). All testing took place in the same  
287 location as in Experiment 1.

### 288 *Test*

289           Participants were distributed into age-matched groups using the same methods as in  
290 Experiment 1. Each group was assigned to one of four conditions with age and gender being  
291 matched (see the distribution of individuals and groups across conditions in Table S2 and S3; see  
292 scripts for each condition in Appendix S2 and S3).

293           *Sustainability condition* – Right before participants (N=216) began the game, they  
294 participated in an instructor-led discussion. children were instructed to think about nearby forests  
295 and responded to six standardized questions which were designed to lead children to think about  
296 the value of forests and loss of everyday items they used as consequences of losing forests. It  
297 was then explained that in the game their donations would be used to help keep a forest healthy.

298 During the discussion they were told 1) the tokens they receive represent money made from  
299 selling lumber from the forest they were to manage 2) meeting the donation threshold (filling the  
300 collection bank with 36 tokens) increased the forest productivity while failing reduced it and 3)  
301 success translated into 24 tokens for everyone in the next round while failure reduced the  
302 productivity of the forest to 8 tokens per player and required a 90 second waiting period between  
303 rounds while the forest recovered on its own (Fig 1B).

304 *Sustainability Control*– participants (N=144) did not discuss forest conservation with an  
305 instructor and were told they received the same 12 token endowment after each round regardless  
306 of whether the group met the threshold. There was never a delay between rounds.

307 *Delay condition* – participants (N=78) did not discuss forest conservation with an  
308 instructor and were told failure to meet the donation threshold and fill the collection bank would  
309 result in a 90 second delay before the next round. Unlike the sustainability condition, they were  
310 told they would receive the same 12 token endowment regardless of success or failure at meeting  
311 the threshold (Fig 1C).

312 *Delay Control* – children (N=78) did not discuss forest conservation and were told they  
313 received the same 12 token endowment after each round regardless of whether the group met the  
314 threshold. There was never a delay between rounds.

315 In this experiment, there were three trials per round, with 3 rounds total. Children could  
316 donate 0, 2 or 4 tokens per trial, and the donation threshold was 36 tokens per round. The  
317 procedure of each trial is same to Experiment 1.

### 318 **Data analysis**

319 Like Experiment 1, we analyzed the group success pattern using Binomial generalized  
320 linear regression models and calculated the contrasts between conditions from the results (Table

321 S7). We analyzed individual donation patterns using a mixed effects Poisson regression model  
322 with fixed effects for condition, age and gender, and accumulated tokens per trial (see full results  
323 in Table S8). We calculated individual donation patterns by age from the results. In a separate  
324 Poisson regression model, we analyzed individual donation after completing the threshold and  
325 compared the patterns across conditions (Table S9).

## 326 **Results and discussion**

327 The results support the AH with both the sustainability and delay groups having higher  
328 success rates in meeting the threshold than the control conditions (Fig. 4). Groups in the  
329 Sustainability condition were far more likely to reach the donation threshold than groups in the  
330 Sustainability Control ( $z = 5.58, p < .001, 95\% \text{ CI } [2.42, 5.00]$ ). Similarly, groups in the Delay  
331 condition succeeded in reaching the donation threshold more than those in the Delay Control  
332 condition ( $z = 2.44, p = .015, 95\% \text{ CI } [0.16, 2.56]$ ). The Sustainability Condition yielded higher  
333 success rates than the Delay condition ( $z = 3.08, p = .002, 95\% \text{ CI } [0.76, 3.41]$ ), while the  
334 controls did not differ from each other significantly.

335 The individual analysis revealed the same pattern of results. Participants in the  
336 Sustainability Condition gave more tokens than those in Sustainability Control condition ( $z =$   
337  $7.47, p < .001, 95\% \text{ CI } [0.40, 0.68]$ ) and individuals in the Delay Condition gave more tokens than  
338 those in Delay Control condition ( $z = 4.28, p < .001, 95\% \text{ CI } [0.23, 0.64]$ ). There was also a trend  
339 that participants in the Sustainability condition donated more than the Delay condition ( $z = 1.71,$   
340  $p = .088, 95\% \text{ CI } [-0.02, 0.31]$ ). We did not find significant difference between the two control  
341 groups.

342 After the group donation met the threshold, participants in the Sustainability condition  
343 still donated more than the Sustainability Control condition ( $t = 3.57, p < .001, 95\% \text{ CI } [0.16,$

344 1.42]). Similarly, participants in the Delay condition donated more than the Delay Control  
345 condition after meeting the threshold ( $t = 4.46$ ,  $p < .001$ , 95% CI [-0.01, 1.06]). We did not see  
346 difference between the Sustainability and Control conditions, or difference between the two  
347 controls after the threshold was met. Age did not affect individual donation in the he  
348 Sustainability or Delay Condition. However, in the control conditions, older children donated  
349 significantly more than younger children (Sustainability Control:  $z = 2.21$ ,  $p = .002$ , 95% CI  
350 [1.07, 1.23]; Delay Control:  $z = 4.13$ ,  $p = .002$ , 95% CI [1.00, 1.10]).

351

## 352 **General discussion**

353 Overall, results of our experiments support the predictions of the *Anthrophilia*  
354 Hypothesis. Across all three countries, children were most likely to successfully cooperate to  
355 support forest conservation when extrinsic motivation was highest. Even children attending an  
356 environmental camp in the U.S. were unlikely to meet the donation threshold without rewards or  
357 punishment. Cultural differences and differences in population level resource certainty likely  
358 also shape donation preferences. In the second experiment, we demonstrated that even minimal  
359 extrinsic motivation boosted cooperation--just the threat of minor time delay between rounds  
360 significantly increased success in reaching the threshold in children of all ages. We also found  
361 that simulating the costs and benefits of sustainable forest management led to the highest levels  
362 of cooperation observed. Children were most successful at working together when they  
363 personally experienced loss or gain as a result of their collective decisions around responsibly  
364 managing the forest that produced their endowment.

365 There was limited evidence in support of the *Biophilia* Hypothesis. Intrinsic motives  
366 were not strong enough to consistently drive cooperation across nationality or condition. Only a



367 minority of groups succeeded when there was no personal consequence associated with group  
368 success or failure. When failure resulted in loss of reward, children in the US and DRC curtailed  
369 donations as soon as their own selfish rewards were secured. This suggests children understood  
370 how to maximize their individual payoff, but they were only motivated to give minimally when  
371 the common-pool good conflicted with their own interest. The exception to this pattern was the  
372 Chinese children who donated even after the threshold was met. It may be they understood the  
373 rules of the donation games differently. However, all of the children that participated from each  
374 country were required to pass the same comprehension check to assure they all understood the  
375 game. It seems more likely that the Chinese children's collectivist cultural background  
376 encouraged generosity here (Ma et al., 2015). Meanwhile, the perception of forest scarcity, a  
377 potential form of resource uncertainty, might have motivated Chinese children higher donations.

378         Together, these findings suggest that in addition to observing and learning about wildlife  
379 and wild places, children benefit from experiencing the decision-making process required to  
380 protect common-pool goods like a forest. Future research can better characterize the psychology  
381 underlying and developmental trajectory of this form of prosocial behavior directed at nonsocial  
382 agent. Infants develop different forms of prosocial helping, sharing and comforting that rely on  
383 different types of social cognition and first appear at different time points (Dunfield, 2014).  
384 Similarly, the type of donation behavior seen here may rely on a specific set of social cognitive  
385 skills. Identifying the associated cognition and understanding its development could help target  
386 the time when playing these types of games might have the greatest impact on children. Further,  
387 cross-cultural research is also badly needed, especially with children from developing countries  
388 with more resource uncertainty or different cultural norms than those tested here. For example,  
389 future research will need to replicate the Sustainability condition from Experiment 2 with

390 participants who are not in a conservation related camp and are instead from a range of countries  
391 and non-WEIRD cultures. While the results from Experiment 1 suggest a range of children will  
392 respond similarly to the extrinsic motivators used in the sustainability condition of Experiment 2,  
393 this prediction needs to be tested. It will also be important to test if participation in sustainability  
394 simulations translate to participants showing pro-conservation decisions beyond the experimental  
395 context (e.g., are participants in these simulations more willing to advocate for conservation  
396 initiatives or change their own behavior in real life?). With such knowledge, a powerful new tool  
397 will become available to be included in conservation education curriculum. Vital common-pool  
398 goods – including forests – will experience enhanced protection. Both people and wild places  
399 will benefit.

400

401

402

## 403 **References**

- 404 Ariely, D., Bracha, A., & Meier, S. (2009). Doing good or doing well? Image motivation and monetary  
405 incentives in behaving prosocially. *American Economic Review*, 99(1), 544-555.
- 406 Belsky, J. (2008). War, trauma and children's development: Observations from a modern evolutionary  
407 perspective. *International Journal of Behavioral Development*, 32(4), 260-271.
- 408 Bowie, A., Krupenye, C., Mbonzo, P., Minesi, F., & Hare, B. (2020). Implicit measures help demonstrate  
409 the value of conservation education in the Democratic Republic of the Congo. *Frontiers in*  
410 *psychology*, 11, 386.
- 411 Boyd, R., Gintis, H., & Bowles, S. (2010). Coordinated punishment of defectors sustains cooperation and  
412 can proliferate when rare. *Science*, 328(5978), 617-620.
- 413 Chapais, B. (2001). Primate nepotism: what is the explanatory value of kin selection? *International*  
414 *Journal of Primatology*, 22(2), 203-229.
- 415 Dunfield, K. A. (2014). A construct divided: prosocial behavior as helping, sharing, and comforting  
416 subtypes. *Frontiers in psychology*, 5, 958.
- 417 Eisenberg, N., Lennon, R., & Roth, K. (1983). Prosocial development: a longitudinal study.  
418 *Developmental Psychology*, 19(6), 846.
- 419 Engelmann, J. M., Herrmann, E., & Tomasello, M. (2018). Concern for group reputation increases  
420 prosociality in young children. *Psychological Science*, 29(2), 181-190.
- 421 Eom, K., Kim, H. S., Sherman, D. K., & Ishii, K. (2016). Cultural variability in the link between  
422 environmental concern and support for environmental action. *Psychological Science*, 27(10),  
423 1331-1339.

- 424 Flanagan, C., & Gallay, E. (2014). Adolescents' theories of the commons. *Advances in child development*  
425 *and behavior*, 46, 33-55.
- 426 Frankenhuis, W. E., Panchanathan, K., & Nettle, D. (2016). Cognition in harsh and unpredictable  
427 environments. *Current Opinion in Psychology*, 7, 76-80.
- 428 Hauser, O. P., Rand, D. G., Peysakhovich, A., & Nowak, M. A. (2014). Cooperating with the future.  
429 *Nature*, 511(7508), 220-223.
- 430 Henrich, J., Boyd, R., Bowles, S., Camerer, C., Fehr, E., Gintis, H., McElreath, R., Alvard, M., Barr, A.,  
431 & Ensminger, J. (2005). "Economic man" in cross-cultural perspective: Behavioral experiments  
432 in 15 small-scale societies. *Behavioral and brain sciences*, 28(6), 795-855.
- 433 Hermes, H., Hett, F., Mechtel, M., Schmidt, F., Schunk, D., & Wagner, V. (2020). Do children cooperate  
434 conditionally? Adapting the strategy method for first-graders. *Journal of Economic Behavior &*  
435 *Organization*, 179, 638-652.
- 436 Hill, K., & Hurtado, A. M. (2017). *Ache life history: The ecology and demography of a foraging people*.  
437 Routledge.
- 438 Jacquet, J., Hagel, K., Hauert, C., Marotzke, J., Röhl, T., & Milinski, M. (2013). Intra-and  
439 intergenerational discounting in the climate game. *Nature climate change*, 3(12), 1025-1028.
- 440 Kahn Jr, P. H. (1997). Developmental psychology and the biophilia hypothesis: Children's affiliation with  
441 nature. *Developmental review*, 17(1), 1-61.
- 442 Keil, J., Michel, A., Sticca, F., Leipold, K., Klein, A. M., Sierau, S., von Klitzing, K., & White, L. O.  
443 (2017). The Pizzagame: A virtual public goods game to assess cooperative behavior in children  
444 and adolescents. *Behavior research methods*, 49(4), 1432-1443.
- 445 Kellert, S. R. (1995). *The biophilia hypothesis*. Island Press.
- 446 Koomen, R., & Herrmann, E. (2018). An investigation of children's strategies for overcoming the tragedy  
447 of the commons. *Nature human behaviour*, 2(5), 348-355.
- 448 Li, W. H. (2004). Degradation and restoration of forest ecosystems in China. *Forest Ecology and*  
449 *Management*, 201(1), 33-41.
- 450 Ma, Q., Pei, G., & Jin, J. (2015). What makes you generous? The influence of rural and urban rearing on  
451 social discounting in China. *PloS one*, 10(7), e0133078.
- 452 Milinski, M., Sommerfeld, R. D., Krambeck, H.-J., Reed, F. A., & Marotzke, J. (2008). The collective-  
453 risk social dilemma and the prevention of simulated dangerous climate change. *Proceedings of*  
454 *the National Academy of Sciences*, 105(7), 2291-2294.
- 455 Moore, C. (2009). Fairness in children's resource allocation depends on the recipient. *Psychological*  
456 *Science*, 20(8), 944-948.
- 457 Ryan, R. M., & Deci, E. L. (2000). Intrinsic and extrinsic motivations: Classic definitions and new  
458 directions. *Contemporary educational psychology*, 25(1), 54-67.
- 459 Ryan, R. M., & Deci, E. L. (2020). Intrinsic and extrinsic motivation from a self-determination theory  
460 perspective: Definitions, theory, practices, and future directions. *Contemporary Educational*  
461 *Psychology*, 61, 101860.
- 462 Saylan, C., & Blumstein, D. (2011). *The failure of environmental education (and how we can fix it)*. Univ  
463 of California press.
- 464 Silk, J. B. (2002). Kin selection in primate groups. *International Journal of Primatology*, 23(4), 849-875.
- 465 Silk, J. B. (2006). Practicing Hamilton's rule: kin selection in primate groups. In *Cooperation in primates*  
466 *and humans* (pp. 25-46). Springer.
- 467 Silk, J. B., & House, B. R. (2011). Evolutionary foundations of human prosocial sentiments. *Proceedings*  
468 *of the National Academy of Sciences*, 108(Supplement 2), 10910-10917.
- 469 Singer, P. (1981). *The expanding circle*. Clarendon Press Oxford.
- 470 Spence, A., Poortinga, W., & Pidgeon, N. (2012). The psychological distance of climate change. *Risk*  
471 *Analysis: An International Journal*, 32(6), 957-972.
- 472 Van der Linden, S. (2015). The social-psychological determinants of climate change risk perceptions:  
473 Towards a comprehensive model. *Journal of Environmental Psychology*, 41, 112-124.
- 474 Van Vugt, M. (2009). Triumph of the commons. *New Scientist*, 203(2722), 40-43.

475 Vogelsang, M., Jensen, K., Kirschner, S., Tennie, C., & Tomasello, M. (2014). Preschoolers are sensitive  
476 to free riding in a public goods game. *Frontiers in psychology*, 5, 729.  
477 Wagner, J. A. I. (1995). Studies of individualism-collectivism: Effects on cooperation in groups.  
478 *Academy of Management journal*, 38(1), 152-173.  
479 Warneken, F., Hare, B., Melis, A. P., Hanus, D., & Tomasello, M. (2007). Spontaneous altruism by  
480 chimpanzees and young children. *PLoS biology*, 5(7), e184.  
481 Warneken, F., & Tomasello, M. (2008). Extrinsic rewards undermine altruistic tendencies in 20-month-  
482 olds. *Developmental psychology*, 44(6), 1785.  
483 WHO's Global Health Observatory. (2019). <https://www.who.int/countries/>  
484 Wilson, E. O. (1984). *Biophilia*. Harvard University Press.  
485 *The World Bank Open Data*. (2018). World Bank. <https://doi.org/https://data.worldbank.org>  
486 Yang, F., Choi, Y.-J., Misch, A., Yang, X., & Dunham, Y. (2018). In defense of the commons: Young  
487 children negatively evaluate and sanction free riders. *Psychological Science*, 29(10), 1598-1611.  
488 Zhang, W., Zhao, J., & Chen, J. (2019). Nature club programs promote adolescents' conservation  
489 behavior: A case study in China's biodiversity hotspot. *The Journal of Environmental Education*,  
490 50(3), 192-207.  
491

492

493 **Acknowledgments:** The authors wish to thank all the participants, the staff of Lola ya Bonobo,  
494 Fanny Minesi, Claudine André, Raphael Belais for continuous support, Blaise Mwaki for data  
495 collection in the DRC. The Yongding Branch of Beijing No. 2 Experimental Primary School  
496 helped with data collection in China. Thanks also to support at Zoo Atlanta from Michelle Kolar,  
497 Staci Wiech, and Yeta Robinson, Daniel Hontz, and Zoo ATL research assistances Amanda  
498 Danner, Feruthe Kidane, Gianna Ossello, Julia Villegas, and Kyle Smith. We are also grateful to  
499 the two reviewers whose suggestions tremendously improved this paper.

500

501 **Conflict of Interest:** The authors declare no competing interests.

502

503 **Funding:** This project was made possible by funds from Duke University via the Duke Tropical  
504 Conservation Initiative.

505

506 **Data Availability Statement:** The data that supports the findings of this study are available in  
507 the supplementary material of this article.

508

509 **Ethics:** Ethics approval for all studies was granted by Duke University Campus IRB protocol  
510 #2017-1004 (USA and DRC) and protocol # 2017-1054 (China).

511

512 **Author Contributions:** AB and WZ contributed equally to this work and share first authorship.

513 AB is listed first on the paper, but both will each list their names first for this paper on their C.V.

514 AB, JT, WZ, BH designed the study, AB, PW, and WZ analyzed the data. AB, WZ, and BH

515 wrote the manuscript. TS and YS provided resources and supported study implementation.

516

517 **Supplementary Materials:**

518 Materials and Methods

519 Figures S1

520 Tables S1-S9

521 Appendix S1-S3

522 External Database S1-S3

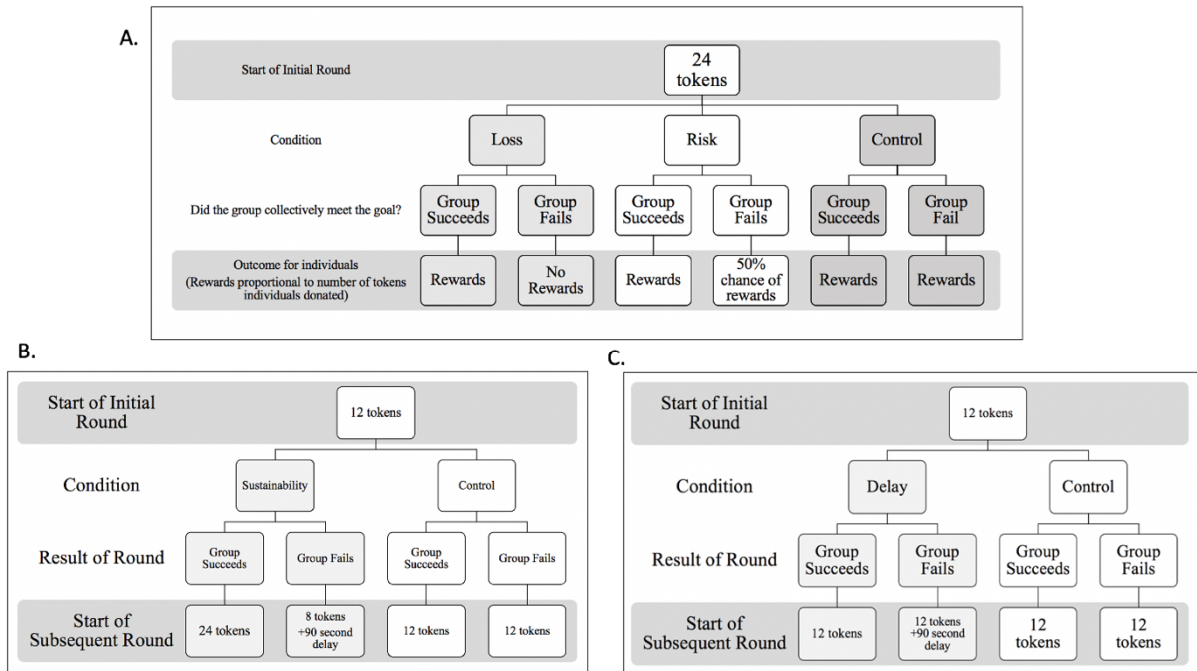

523

524

525 **Figure 1. A)** Outcomes for conditions in Experiment 1. Group Success indicates if the group  
 526 collectively gives enough to the collection bank to meet the conservation goal (72 tokens).

527 Reward indicates that individuals in the group can exchange their remaining tokens for rewards.

528 B) Differential outcomes for the Sustainability and Control Conditions in Experiment 2. C) The

529 Delay and Control study in Experiment 2. Success in a round for B and C required the group to

530 collectively donate minimum of 36 tokens.

531

532

533

534

535

536

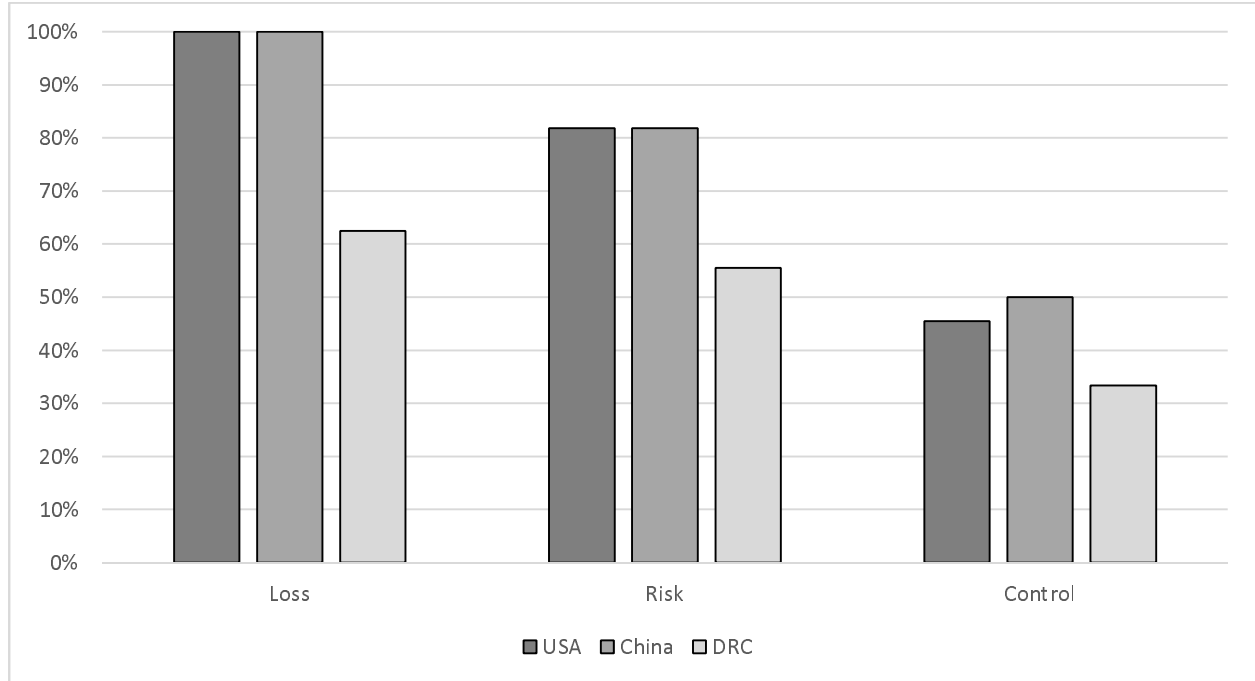

537

538 **Figure 2.** The rate that group donation met the threshold (72 tokens) by condition and country in

539 Experiment 1.



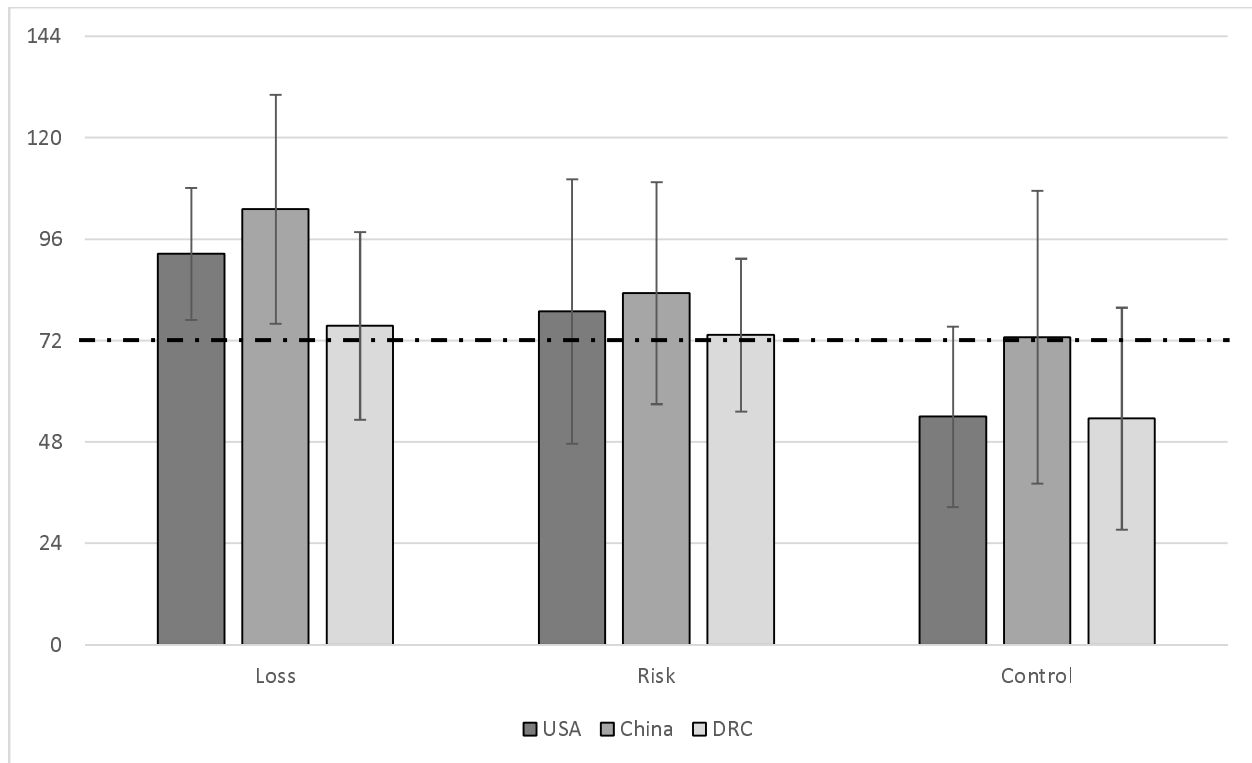

540

541 **Figure 3.** Average group donations by condition and country in Experiment 1. Error bars  
542 represent standard deviations. The horizontal dashed line represents the number of tokens (72)  
543 needed to reach the conservation threshold.

544

545

546

547

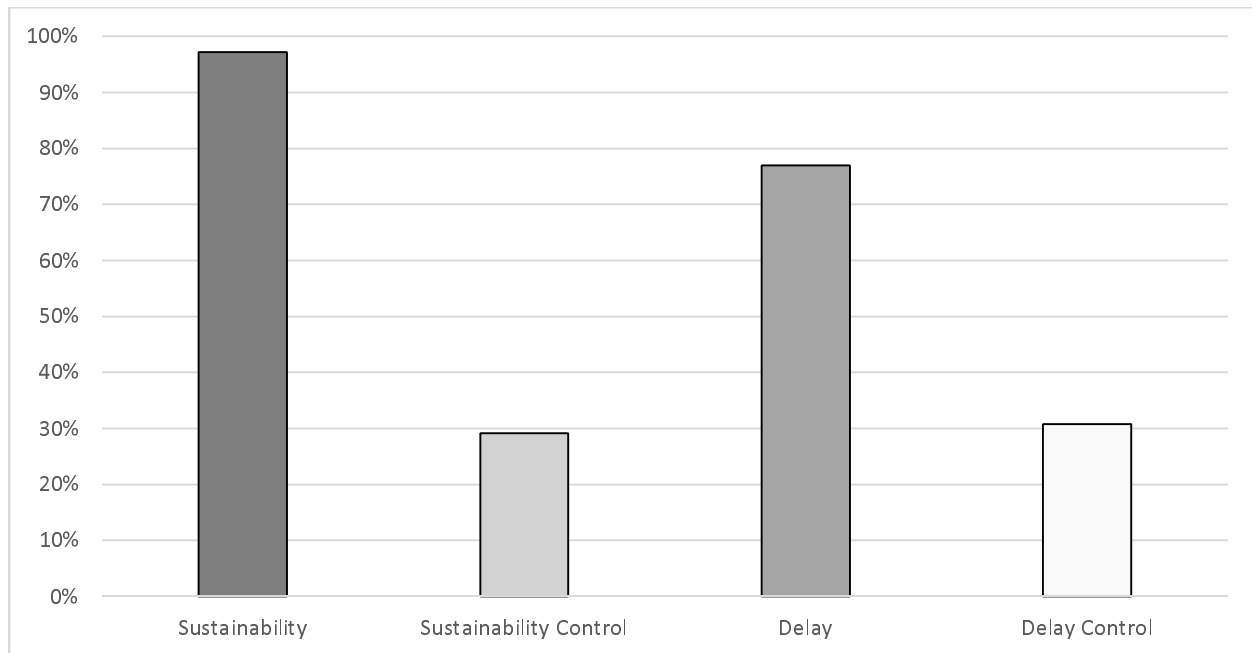

548

549 **Figure 4.** The success rate that group donation met the threshold (36 tokens) by condition in

550 Experiment 2.

551

552

553

554
